# Supplementary material for: Research of Processing Technology of Longjing Tea with ‘Baiye 1’ Based on Non-Targeted Aroma Metabolomics
Source: MDPI journal article supplement (doi:10.3390/foods13091338), 2024-04-26
Supplement: s1 [file s1]

**Supplemental Figure S2: The balloon plot of amino acid content change rate in different processing processes.**

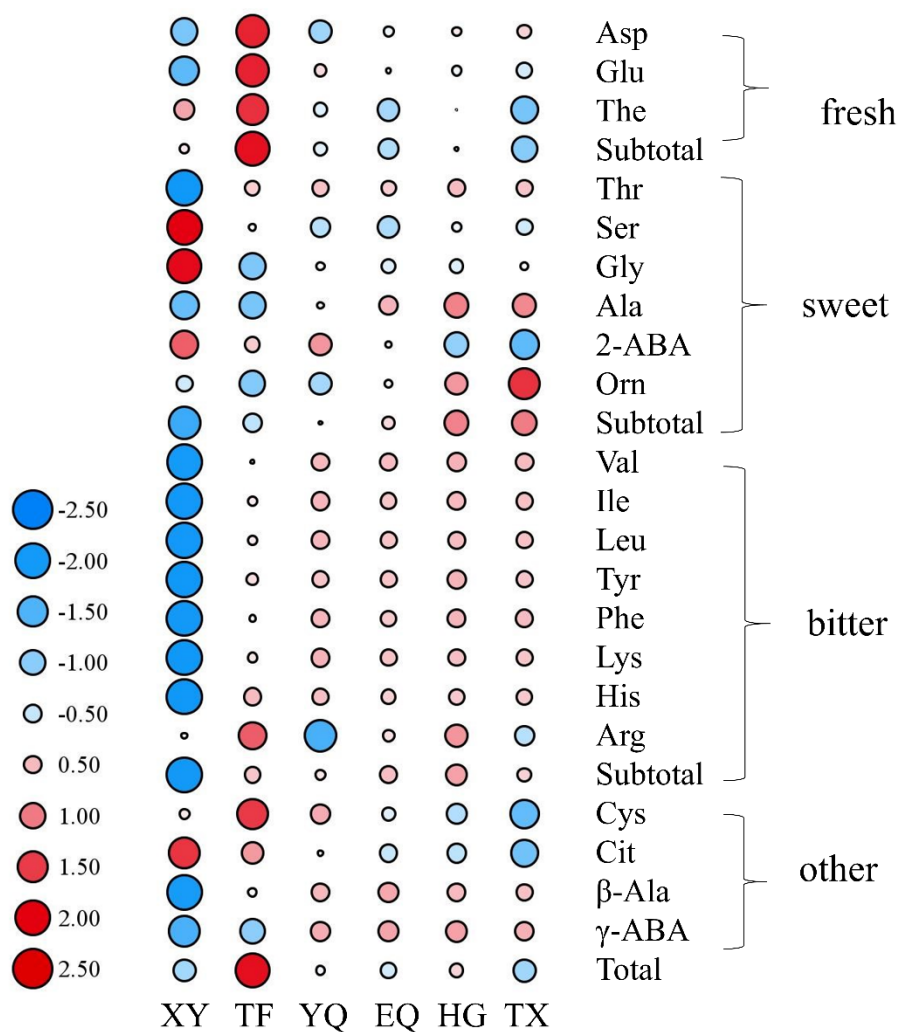

Asp, Aspartic acid; Glu, Glutamic acid; The, theanine; Thr, Threonine; Ser, serine; Gly, glycine; Ala, Alanine; 2-Aba, 2-Aminobutyric acid; Orn, ornithine; Val, valine; Ile, isoleucine; Leu, leucine; Tyr, tyrosine; Phe, phenylalanine; Lys, lysine; His, histidine; Arg, Arginine; Cys, Cysteine; Cit, citrulline;  $\beta$ -Ala,  $\beta$ -alanine,  $\gamma$ -ABA,  $\gamma$ -aminobutyric acid; XY indicates fresh leaves, TF indicates spreading fresh leaves, YQ indicates first panning leaves, EQ indicates second panning leaves, HG indicates final panning leaves, TX indicates fragrance enhancing leaves.
