# Supplementary material for: Research of Processing Technology of Longjing Tea with ‘Baiye 1’ Based on Non-Targeted Aroma Metabolomics
Source: MDPI journal article supplement (doi:10.3390/foods13091338), 2024-04-26
Supplement: s1 [file s1]

**Supplemental Table S3: Analysis of amino acid compositions in brewed tea soup**

| Types  | Components             | XY              | TF           | YQ            | EQ            | HG            | TX            |
|--------|------------------------|-----------------|--------------|---------------|---------------|---------------|---------------|
| Fresh  | L-aspartic acid        | 19.2±0.3 CDd    | 17.2±0.2 Dd  | 23.5±1.0 Cc   | 40.4±0.6 Bb   | 59.7±1.0 Aa   | 62.9±2.7 Aa   |
|        | L-glutamic acid        | 26.5±0.5 Dd     | 25.0±0.3 Dd  | 36.3±1.8 Cc   | 60.7±1.2 Bb   | 84.4±1.6 Aa   | 86.7±0.7 Aa   |
|        | L-theanine             | 174.7±3.8 CDc   | 132.5±0.1 Dd | 183.1±6.9 Cc  | 343.8±14.0 Bb | 614.6±27.8 Aa | 642.0±4.2 Aa  |
|        | subtotal               | 220.4±4.6 CDc   | 174.8±0.6 Dd | 242.8±9.6 Cc  | 444.9±15.7 Bb | 758.7±30.4 Aa | 791.6±1.0 Aa  |
|        | L-threonine            | 1.75±0.02 De    | 2.12±0.03 Dd | 3.56±0.17 Cc  | 5.84±0.07 Bb  | 8.63±0.12 Aa  | 8.96±0.18 Aa  |
| Sweet  | L-serine               | 6.9±0.1 De      | 5.1±0.0 Ee   | 8.3±0.4 Cc    | 13.3±0.1 Bb   | 19.0±0.6 Aa   | 19.9±0.1 Aa   |
|        | L-glycine              | 0.40±0.01 De    | 0.27±0.01 Ef | 0.45±0.01 Cd  | 0.72±0.01 Bc  | 1.00±0.01 Ab  | 1.05±0.03 Aa  |
|        | L-alanine              | 2.9±0.1 Dd      | 2.2±0.0 Ee   | 3.9±0.2 Cc    | 6.0±0.1 Bb    | 8.5±0.3 Aa    | 8.9±0.2 Aa    |
|        | 2-Aminobutyric acid    | 0.13±0.00 CDd   | 0.11±0.01 Dd | 0.18±0.02 Cc  | 0.33±0.02 Bb  | 0.45±0.02 Aa  | 0.45±0.04 Aa  |
|        | L-methionine           | 0.04±0.00 De    | 0.04±0.00 De | 0.10±0.00 Cd  | 0.18±0.00 Bc  | 0.29±0.01 Ab  | 0.31±0.01 Aa  |
|        | L-ornithine            | 0.76±0.02 Dd    | 0.64±0.01 Dd | 0.80±0.05 Dd  | 1.54±0.08 Cc  | 2.59±0.03 Bb  | 2.97±0.15 Aa  |
|        | subtotal               | 12.9±0.2 De     | 10.5±0.1 Ef  | 17.3±0.8 Cd   | 27.8±0.2 Bc   | 40.5±1.0 Ab   | 42.5±0.2 Aa   |
|        | L-valine               | 0.49±0.02 Ee    | 1.27±0.02 Dd | 2.20±0.03 Cc  | 3.10±0.13 Bb  | 4.01±0.06 Aa  | 4.05±0.03 Aa  |
|        | L-isoleucine           | 0.12±0.01 Ef    | 0.62±0.00 De | 1.17±0.03 Cd  | 1.78±0.06 Bc  | 2.51±0.01 Ab  | 2.62±0.00 Aa  |
|        | L-leucine              | 0.35±0.03 Ff    | 1.39±0.01 Ee | 2.50±0.07 Dd  | 3.80±0.08 Cc  | 5.33±0.05 Bb  | 5.57±0.05 Aa  |
| Bitter | L-tyrosine             | 0.15±0.01 Ef    | 0.72±0.01 De | 1.28±0.03 Cd  | 2.27±0.04 Bc  | 4.32±0.06 Ab  | 4.45±0.04 Aa  |
|        | L-phenylalanine        | 0.32±0.02 Ee    | 1.88±0.03 Dd | 3.47±0.16 Cc  | 6.24±0.27 Bb  | 10.96±0.12 Aa | 11.42±0.30 Aa |
|        | L-lysine               | 0.18±0.02 Ff    | 0.47±0.00 Ee | 1.24±0.08 Dd  | 2.41±0.08 Cc  | 4.23±0.00 Bb  | 4.45±0.04 Aa  |
|        | L-histidine            | 0.32±0.02 Dd    | 0.36±0.01 Dd | 0.83±0.04 Cc  | 1.66±0.08 Bb  | 2.85±0.14 Aa  | 3.00±0.26 Aa  |
|        | L-arginine             | 10.6±0.1 CDcd   | 6.4±0.0 Dd   | 14.6±0.6 Cc   | 30.9±2.2 Bb   | 59.0±3.3 Aa   | 63.3±0.8 Aa   |
|        | subtotal               | 12.5±0.2 Dd     | 13.1±0.1 Dd  | 27.3±1.0 Cc   | 52.2±2.9 Bb   | 93.2±3.5 Aa   | 98.9±0.7 Aa   |
|        | L-cystine              | 3.9±0.1 Dd      | 3.3±0.0 Dd   | 5.2±0.1 Cc    | 9.1±0.1 Bb    | 15.1±0.2 Aa   | 15.7±0.9 Aa   |
|        | L-citrulline           | 0.40±0.02 Cc    | 0.26±0.01 Dd | 0.43±0.01 Cc  | 0.72±0.06 Bb  | 1.14±0.04 Aa  | 1.13±0.03 Aa  |
| Other  | β-Alanine              | 0.09±0.00 Ee    | 0.19±0.01 Dd | 0.37±0.02 Cc  | 0.58±0.015 Bb | 0.89±0.01 Aa  | 0.93±0.01 Aa  |
|        | 3-aminoisobutyric acid | 0.061±0.012 Ccd | 0.06±0.00 Cd | 0.09±0.01 Cc  | 0.14±0.01 Bb  | 0.29±0.01 Aa  | 0.30±0.00 Aa  |
|        | γ-aminobutyric acid    | 0.59±0.01 Dd    | 0.59±0.02 Dd | 1.79±0.11 Cc  | 2.60±0.09 Bb  | 4.02±0.26 Aa  | 4.10±0.15 Aa  |
|        | total                  | 250.9±5.1 CDd   | 202.8±0.7 Dd | 295.4±11.6 Cc | 538.0±19.1 Bb | 913.9±35.5 Aa | 955.2±0.8 Aa  |

μg/ml in brewed tea soup. Different uppercase letters indicate  $p<0.01$  level and different lowercase letters indicate  $p<0.05$ .
