# Supplementary material for: Research of Processing Technology of Longjing Tea with ‘Baiye 1’ Based on Non-Targeted Aroma Metabolomics
Source: MDPI journal article supplement (doi:10.3390/foods13091338), 2024-04-26
Supplement: s1 [file s1]

**Supplemental Table S2: Analysis of differential aroma metabolites**

| Aroma substance                                    | XY            | TF            | YQ             | EQ              | HG             | TX              |
|----------------------------------------------------|---------------|---------------|----------------|-----------------|----------------|-----------------|
| Geraniol                                           | 10603±3458 Aa | 12404±1103 Aa | 277±39 Bb      | 307±36 Bb       | 269±43 Bb      | 215±27 Bb       |
| 2-Methylfuran                                      | 7631±2018 Bb  | 7482±1063 Bb  | 11241±461 ABa  | 12101±1690 ABa  | 13776±151 Aa   | 16070±1094 Aa   |
| Linalool                                           | 6520±1694 Aa  | 7478±509 Aa   | 225±8 Bb       | 251±30 Bb       | 210±38 Bb      | 186±32 Bb       |
| Methyl salicylate                                  | 4214±925 Aa   | 2966±228 Ab   | 169±45 Bc      | 135±11 Bc       | 122±17 Bc      | 92±8 Bc         |
| Linalool Oxide I                                   | 2838±715 Aa   | 3440±290 Aa   | 107±7 Bb       | 144±20 Bb       | 114±19 Bb      | 99±17 Bb        |
| Phenylethyl Alcohol                                | 2460±710 Bb   | 3714±318 Aa   | 143±38 Cc      | 138±10 Cc       | 136±15 Cc      | 100±6 Cc        |
| β-Myrcene                                          | 1368±437 Aa   | 1483±98 Aa    | 73.5±8 Bb      | 87.3±3.8 Bb     | 74.3±10.7 Bb   | 71.5±9.4 Bb     |
| Acetaldehyde                                       | 862±206 Bb    | 1721±110 Aa   | 27.0±2 Cc      | 27.3±2.6 Cc     | 25.7±2.2 Cc    | 24.4±3.6 Cc     |
| 1-Hexanol                                          | 824±220 Aa    | 367±24 Bb     | 15.4±1 Cc      | 16.8±2.5 Cc     | 17.5±3.3 Cc    | 12.7±1.9 Cc     |
| (Z)-3-Hexen-1-ol,                                  | 626±168 Aa    | 486±39 Aa     | 7.9±0 Bb       | 7.3±0.8 Bb      | 7.3±0.8 Bb     | 5.9±1.0 Bb      |
| (E)-5,9-Undecadien-2-One, 6,10-Dimethyl-,          | 579±193 Aa    | 617±53 Aa     | 8.8±0 Bb       | 11.6±0.4 Bb     | 12.9±2.0 Bb    | 11.2±1.5 Bb     |
| 2-Butenal                                          | 485±99 Bb     | 1457±149 Aa   | 3.1±1 Cc       | 3.7±0.8 Cc      | 4.4±1.0 Cc     | 3.4±1.0 Cc      |
| Benzyl alcohol                                     | 480±130 Aa    | 529±63 Aa     | 35.6±6 Bb      | 37.3±3.3 Bb     | 39.9±4.6 Bb    | 32.3±3.5 Bb     |
| Trans-β-Ocimene                                    | 460±147 Aa    | 500±37 Aa     | 23.6±2 Bb      | 26.5±1.6 Bb     | 23.0±3.9 Bb    | 21.9±3.0 Bb     |
| (E)-2-Hexenal                                      | 405±111 Aa    | 399±72 Aa     | 7.5±1 Bb       | 8.0±0.9 Bb      | 11.1±1.8 Bb    | 9.0±1.5 Bb      |
| Hexanal                                            | 395±114 Aa    | 232±53 Ab     | 23.4±2 Bc      | 19.0±3.6 Bc     | 16.7±2.3 Bc    | 16.8±4.4 Bc     |
| Carveol                                            | 380±98 Ab     | 538±53 Aa     | 53.7±4 Bc      | 88.1±9.8 Bc     | 83.7±13.8 Bc   | 81.8±13.2 Bc    |
| (Z)-2,6-Octadien-1-ol, 3,7-Dimethyl-,              | 133±39 Bb     | 237±18 Aa     | 4.9±1 Cc       | 5.7±0.4 Cc      | 4.9±0.9 Cc     | 4.0±0.2 Cc      |
| Dodecane                                           | 44.5±13.1 Bb  | 46.5±12.3 Bb  | 46.7±2.1 Bb    | 49.9±5.6 Bb     | 148.2±27.5 Aa  | 172.6±34.2 Aa   |
| 2-Ethyl-Butanoic Acid, 1,2,3-Propanetriyl Ester    | 33.8±9.4 Cd   | 47.6±5.3 Cd   | 257.8±8.6 Bc   | 346.2±41.5 ABab | 391.1±49.9 Aa  | 279.9±40.9 ABbc |
| N-Caproic Acid Vinyl Ester                         | 19.8±6.8 Bb   | 18.9±1.4 Bb   | 90.5±5.1 Aa    | 107.5±15.1 Aa   | 117.6±26.1 Aa  | 91.6±22.6 Aa    |
| 2-Furancarboxylic Acid, Tetrahydro-3-Methyl-5-Oxo- | 9.44±1.98 Cc  | 13.6±1.7 Cc   | 85.4±3.7 Bb    | 114.4±13.6 ABab | 130.7±18.4 Aa  | 92.6±13.2 ABb   |
| 3,5-Octanedione, 2,2,4,7-Tetramethyl-              | 3.3±0.58 Cc   | 4.00±0.53 Cc  | 75.9±6.2 Bb    | 105.3±13.9 ABab | 126.1±17.4 Aa  | 105.8±21.3 ABab |
| Hexanoic Acid, Anhydride                           | 3.04±0.92 Cc  | 3.86±0.49 Cc  | 31.12±1.33 Bb  | 38.68±4.16 ABab | 44.56±5.82 ABa | 33.88±4.27 Ab   |
| Butylated Hydroxytoluene                           | 2.61±0.56 Cc  | 3.20±0.29 Cc  | 7.01±0.98 Cc   | 13.32±1.04 Bb   | 17.85±2.27 Bb  | 27.48±3.18 Aa   |
| Nonan-4-Yl Acetate                                 | 2.54±0.90 Cc  | 3.46±0.36 Cc  | 22.17±0.76 Bb  | 28.34±2.81 ABab | 32.81±3.73 Aa  | 24.73±3.33 ABb  |
| 1-(1h-Pyrrol-2-Yl)- Ethanone                       | 2.35±1.42 Bb  | 1.58±0.23 Bb  | 6.98±0.80 Bb   | 21.22±2.91 Aa   | 24.05±4.20 Aa  | 25.06±2.44 Aa   |
| 2-((3,3-Dimethyloxiran-2-Yl) Methyl)-3-Methylfuran | 1.20±0.42 Bc  | 2.16±0.80 Bbc | 4.12±0.09 Bb   | 10.62±0.82 Aa   | 10.68±1.09 Aa  | 11.99±1.67 Aa   |
| Furfural                                           | 0.96±0.50 Bc  | 2.61±2.40 Bc  | 4.90±0.24 ABbc | 8.99±0.47 Aab   | 8.48±0.61 Aab  | 10.16±2.62 Aa   |
| Pyrazine, 2,5-Dimethyl-                            | 0.85±0.44 Cc  | 0.93±0.25 Cc  | 17.71±0.56 Bb  | 35.99±2.08 Aa   | 38.01±6.67 Aa  | 31.91±3.77 Aa   |
| 1-Penten-3-One, 2-Methyl-                          | 0.65±0.51 Bc  | 0.50±0.15 Bc  | 3.09±0.28 Bb   | 5.91±0.43 Aa    | 7.96±1.26 Aa   | 7.36±1.31 Aa    |
| 3-Hexen-2-One                                      | 0.34±0.04 Bb  | 2.39±1.85 Bb  | 10.48±0.47 Bb  | 38.55±3.52 Aa   | 42.74±8.13 Aa  | 45.89±6.07 Aa   |
| Pyrazine, Methyl-                                  | 0.11±0.12 Cc  | 0.31±0.19 Cc  | 7.82±0.60 Bb   | 13.46±0.60 Aa   | 14.88±2.24 Aa  | 14.68±2.49 Aa   |

µg/kg tea leaves. Different uppercase letters indicate p<0.01 level and different lowercase letters indicate p<0.05.
