# Supplementary material for: Research of Processing Technology of Longjing Tea with ‘Baiye 1’ Based on Non-Targeted Aroma Metabolomics
Source: MDPI journal article supplement (doi:10.3390/foods13091338), 2024-04-26
Supplement: s1 [file s1]

**Supplemental Table S4: Analysis of amino acid compositions in tea samples**

| Types  | Components          | XY              | TF             | YQ               | EQ                | HG               | TX               |
|--------|---------------------|-----------------|----------------|------------------|-------------------|------------------|------------------|
| Fresh  | L-aspartic acid     | 292.3±1.6 Dd    | 333.0±1.8 Aa   | 296.6±3.3 Dd     | 306.2±1.7 Cc      | 310.5±0.4 BCbc   | 313.0±0.7 Bb     |
|        | L-glutamic acid     | 455.1±2.0 Ee    | 573.7±1.6 Aa   | 517.6±2.0 Bb     | 506.5±2.1 Cc      | 502.4±1.0 Cc     | 493.1±2.4 Dd     |
|        | L-theanine          | 4202.1±78.2 ABb | 4330.4±13.6 Aa | 4065.9±74.6 BCcd | 3997.9±24.4 Ccd   | 4108.4±14.8 BCbc | 3945.4±16.3 Cd   |
|        | subtotal            | 4949.5±78.4 Bb  | 5237.0±13.7 Aa | 4880.1±79.9 BCbc | 4810.6±28.1 BCbc  | 4921.3±14.4 BCb  | 4751.4±17.7 Cc   |
|        | L-threonine         | 31.8±0.1 Cd     | 48.7±0.3 Bc    | 49.4±0.3 ABab    | 48.8±0.4 ABbc     | 49.7±0.1 Aa      | 49.3±0.2 ABabc   |
| Sweet  | L-serine            | 117.1±0.2 Aa    | 111.1±0.3 Bb   | 109.5±1.1 Bbc    | 109.2±0.5 Bc      | 110.9±0.3 Bbc    | 110.1±0.9 Bbc    |
|        | L-glycine           | 6.7±0.3 Aa      | 5.2±0.1 Bb     | 5.7±0.1 Bb       | 5.6±0.2 Bb        | 5.6±0.3 Bb       | 5.7±0.1 Bb       |
|        | L-alanine           | 42.4±0.2 Dd     | 43.0±0.2 Dd    | 47.4±0.5 Cc      | 49.2±0.2 Bb       | 50.6±0.1 Aa      | 50.4±0.3 Aa      |
|        | 2-Aminobutyric acid | 2.7±0.1 Aa      | 2.5±0.1 ABab   | 2.6±0.1 Aab      | 2.4±0.1 ABCbc     | 2.2±0.1 BCcd     | 2.1±0.0 Cd       |
|        | L-ornithine         | 17.2±0.1 CDcd   | 15.8±0.4 Ee    | 16.4±0.2 DEde    | 17.9±0.5 Cc       | 19.8±0.2 Bb      | 21.5±0.1 Aa      |
| Bitter | subtotal            | 216.9±1.6 Dd    | 226.2±0.3 Cc   | 231.0±1.9 Bb     | 233.1±0.4 Bb      | 238.8±0.3 Aa     | 239.1±1.5 Aa     |
|        | L-valine            | 8.6±0.0 Cc      | 25.6±0.2 Bb    | 30.1±0.1 Aa      | 29.9±0.9 Aa       | 30.7±0.2 Aa      | 30.0±0.4 Aa      |
|        | L-isoleucine        | 2.2±0.1 Dd      | 14.5±0.3 Cc    | 16.8±0.3 Aa      | 16.1±0.3 Bb       | 16.6±0.0 ABab    | 16.3±0.0 ABb     |
|        | L-leucine           | 5.6±0.3 Dd      | 31.7±0.1 Cc    | 36.5±0.1 Aa      | 35.3±0.3 Bb       | 35.9±0.2 ABab    | 35.5±0.5 ABb     |
|        | L-tyrosine          | 4.2±0.2 Cd      | 25.8±0.2 Bc    | 27.7±0.7 Ab      | 27.7±0.6 Aab      | 28.9±0.3 Aa      | 27.6±0.3 Ab      |
| Other  | L-phenylalanine     | 7.6±0.1 Dd      | 56.1±0.4 Cc    | 66.8±1.2 Aa      | 63.5±1.4 Bb       | 67.0±0.3 Aa      | 65.7±0.3 ABa     |
|        | L-lysine            | 8.2±0.3 Cd      | 31.5±0.6 Bc    | 35.8±0.1 Aa      | 34.5±0.5 Ab       | 34.8±0.4 Aab     | 34.3±0.5 Ab      |
|        | L-histidine         | 9.9±0.4 Bb      | 17.7±0.4 Aa    | 17.6±0.8 Aa      | 17.2±0.4 Aa       | 17.4±0.4 Aa      | 17.4±0.1 Aa      |
|        | L-arginine          | 508.8±3.4 Bc    | 530.6±1.7 Aa   | 483.3±1.0 De     | 513.4±1.5 Cc      | 523.2±2.4 Ab     | 499.4±2.8 Cd     |
|        | subtotal            | 555.1±3.1 De    | 733.5±2.0 Bbc  | 714.5±0.6 Cd     | 737.7±5.3 Bb      | 754.4±3.5 Aa     | 726.2±4.4 BCc    |
| Other  | L-cystine           | 107.4±1.2 Cc    | 117.7±0.3 Aa   | 110.9±1.0 Bb     | 104.1±0.1 Dd      | 101.2±0.7 Ee     | 96.1±0.7 Ff      |
|        | L-citrulline        | 9.9±0.2 Aa      | 9.0±0.1 Bb     | 8.1±0.1 Cc       | 7.6±0.1 Dd        | 7.5±0.0 Dd       | 6.8±0.1 Ee       |
|        | β-Alanine           | 1.79±0.05 Cc    | 3.51±0.38 Bb   | 4.09±0.11 ABa    | 4.20±0.21 Aa      | 4.08±0.10 ABa    | 4.03±0.07 ABab   |
|        | γ—aminobutyric acid | 8.8±0.1 Dd      | 12.8±0.2 Cc    | 24.1±0.3 ABab    | 24.5±0.3 ABab     | 24.7±0.2 Aa      | 23.8±0.3 Bb      |
|        | total               | 5850.3±74.9 Dd  | 6339.7±15.2 Aa | 5972.8±82.8 BCbc | 5921.7±33.6 BCDbc | 6052.1±16.5 Bb   | 5847.4±24.2 CDcd |

mg/100g (dry matter rate). Different uppercase letters indicate  $p<0.01$  level and different lowercase letters indicate  $p<0.05$ .
