# Supplementary material for: Research of Processing Technology of Longjing Tea with ‘Baiye 1’ Based on Non-Targeted Aroma Metabolomics
Source: MDPI journal article supplement (doi:10.3390/foods13091338), 2024-04-26
Supplement: s1 [file s1]

**Supplemental Figure S1: The distribution of dry matter contained in tea during different processing processes.**

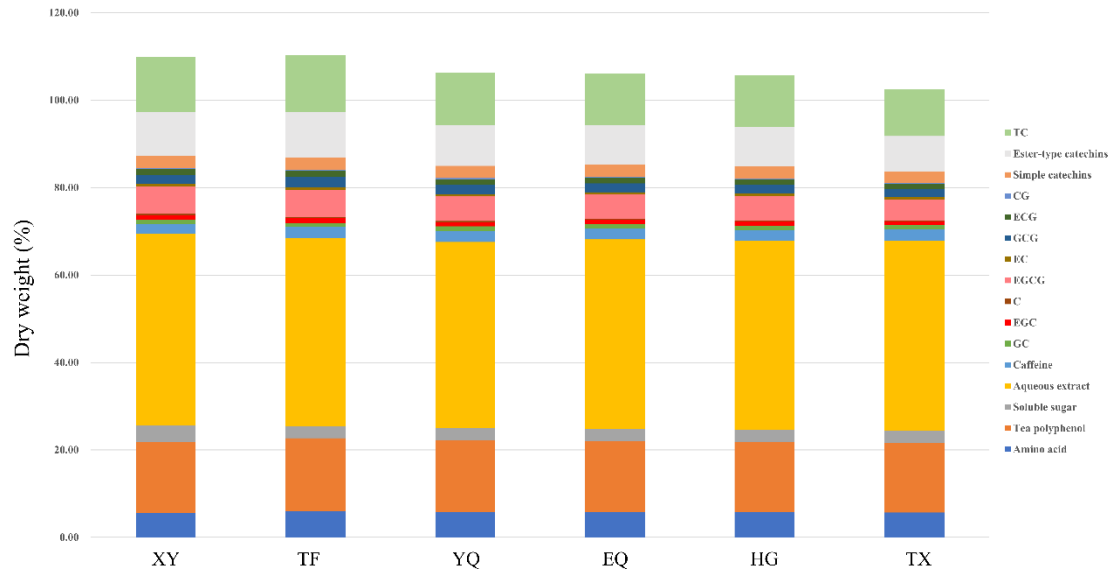

TC, total catechins; GC, gallocatechin; C, catechin; EGC, epigallocatechin; EC, epicatechin; EGCG, epigallocatechin gallate; GCG, gallocatechin gallate; CG, catechingallate; ECG, epicatechin gallate; simple catechins (GC+C+EGC+EC); ester type catechins (EGCG+GCG+CG+ECG); XY indicates fresh leaves, TF indicates spreading fresh leaves, YQ indicates first panning leaves, EQ indicates second panning leaves, HG indicates final panning leaves, TX indicates fragrance enhancing leaves.
